# Supplementary material
Source: Frontiers journal article supplement (https://www.frontiersin.org/articles/215588)
Supplement: Table_2.PDF [file Table_2.PDF]

Affective attitudes: 16 items recorded on a seven point Likert scale

| #  | Item                                                                                                            | Sub scale  | Aspect   | Group 1<br><br><i>Completed<br/>All AA<br/>questions</i> | Group 2<br><br><i>Omitted<br/>All AA<br/>questions</i> | Group 3<br><br><i>Completed<br/>positive<br/>AA<br/>questions</i> |
|----|-----------------------------------------------------------------------------------------------------------------|------------|----------|----------------------------------------------------------|--------------------------------------------------------|-------------------------------------------------------------------|
| 1  | Organ donation allows something positive to come out of a person's death                                        | Benefits   | Positive | X                                                        |                                                        | X                                                                 |
| 2  | Organ donation helps to bring meaning to the death of a loved one                                               | Benefits   | Positive | X                                                        |                                                        | X                                                                 |
| 3  | Removing organs from the body just isn't right                                                                  | Integrity  | Negative | X                                                        |                                                        |                                                                   |
| 4  | The body should be kept whole for burial                                                                        | Integrity  | Negative | X                                                        |                                                        |                                                                   |
| 5  | Hospitals sometimes prescribe medication as a way of experimenting on people without their knowledge or consent | Distrust   | Negative | X                                                        |                                                        |                                                                   |
| 6  | If I sign an organ donor card, doctors might take my organs before I'm actually dead                            | Distrust   | Negative | X                                                        |                                                        |                                                                   |
| 7  | Sometimes, medical procedures are done on people without their consent                                          | Distrust   | Negative | X                                                        |                                                        |                                                                   |
| 8  | If I sign an organ donor card, doctors might not try so hard to save my life                                    | Distrust   | Negative | X                                                        |                                                        |                                                                   |
| 9  | The idea of organ donation is somewhat disgusting                                                               | Ick factor | Negative | X                                                        |                                                        |                                                                   |
| 10 | I wouldn't like the idea of having another person's organs inside of me, even if I needed an organ transplant   | Ick factor | Negative | X                                                        |                                                        |                                                                   |

|    |                                                                                                     |             |          |   |  |   |
|----|-----------------------------------------------------------------------------------------------------|-------------|----------|---|--|---|
| 11 | The thought of organ donation makes me uncomfortable                                                | Ick factor  | Negative | X |  |   |
| 12 | People who donate their organs risk displeasing God or nature                                       | Jinx factor | Negative | X |  |   |
| 13 | The surest way to bring about my own death is to make plans for it like signing an organ donor card | Jinx factor | Negative | X |  |   |
| 14 | Organ donors may not be resurrected because they don't have all their 'parts'                       | Jinx factor | Negative | X |  |   |
| 15 | Organ donors are heroic because they save lives                                                     | Benefits    | Positive | X |  | X |
| 16 | Donating organs would allow part of me to live after I die                                          | Benefits    | Positive | X |  | X |
